# Supplementary material for: Common intermediates in the OH-radical-induced oxidation of cyanide and formamide †
Source: Royal Society of Chemistry journal article supplement (doi:10.1039/a909609d), 2000-01-01
Supplement: a909609d.doc [file a909609d.doc]

© The Royal Society of Chemistry 2000

# Supplementary data

# Common intermediates in the OH-radical-induced oxidation of cyanide and formamide

Florinella Muñoz, Man Nien Schuchmann, Gottfried Olbrich and Clemens von Sonntag*

*Max-Planck-Institut für Strahlenchemie, Stiftstrasse 34-36, P.O. Box 101365*

*D-45470-Mülheim an der Ruhr, Germany*

This file contains the final CCSD[T] energies (in a.u.) and the zero point energies (in kcal/mol; conversion factor: 1 a.u. = 627.5095 kcal/mol) of all radicals discussed in the paper, using the same numbering. Furthermore, the cartesian coordinates (in A) for all species are given, to document the results of the geometry optimizations.

|  | E(CCSD[T]) | E(vib.) |
| --- | --- | --- |
| 1 | 168.97792563 | 19.446 |
| 2 | 168.92450727 | 18.222 |
| 1a | 168.93715066 | 19.302 |
| 2a | 168.86062824 | 19.423 |
| hydrated 1 | 245.28383203 | 36.223 |
| hydrated 2 | 245.30014696 | 36.814 |
| acetyl | 152.93724885 | 25.765 |
| hyd. acetyl | 229.26095365 | 40.694 |
| water | 76.33202558 | 12.858 |

**Coordinates**

Radical (1):

| x y z |
| --- |
| O -1.089058151 -0.055571010 0.332886676 |
| C -0.144020637 -0.047628834 -0.350849439 |
| N 1.145148527 0.135326614 -0.067693655 |
| H 1.433397256 0.298701728 0.870045707 |
| H 1.822559841 0.107880000 -0.786313491 |

Radical (2):

| x y z |
| --- |
| O -1.064289702 0.234937874 0.000000000 |
| C -0.065643796 -0.407644578 0.000000000 |
| N 1.164067743 0.119750146 0.000000000 |
| H 1.616313786 1.003790076 0.000000000 |
| H -0.045665252 -1.495425380 0.000000000 |

Radical (1a):

| x y z |
| --- |
| O -0.953057102 0.353078194 -0.042909512 |
| C 0.179193783 -0.256349727 -0.340972115 |
| N 1.307792691 -0.163958869 0.107411101 |
| H -1.654829558 0.042954235 -0.590861833 |
| H 1.407762282 0.505334188 0.851282486 |

Radical (2a):

| x y z |
| --- |
| O 1.032765245 0.193932538 0.021233325 |
| C 0.137049523 0.389289477 0.004702138 |
| N 1.245668649 0.272916738 0.011978222 |
| H 1.742823277 0.430619092 0.032101465 |
| H 0.058323062 -1.479029353 0.006858993 |

Radical (1), hydrated:

| x y z |
| --- |
| N -0.346501512 -1.301474571 -0.580888902 |
| C 0.105667802 -0.143639208 0.138790553 |
| O 1.464875674 -0.006761306 -0.080687886 |
| O -0.188053427 -0.254853640 1.481883532 |
| H -0.436014404 0.723232170 -0.209490346 |
| H 0.370901785 -2.005232843 -0.488945156 |
| H 1.765861018 0.811931299 0.274341348 |
| H 0.286774461 -0.979717408 1.853794059 |

Radical (2), hydrated:

| x y z |
| --- |
| N -0.627275460 -1.154023432 0.236162248 |
| C -0.034304207 0.023546461 -0.240421299 |
| O 1.269959700 0.074249775 0.137433528 |
| O -0.754168724 1.146148459 0.018428584 |
| H -0.029123994 -1.941586588 0.117615392 |
| H -1.507723679 -1.320264867 -0.199170945 |
| H 1.648659339 0.874574014 -0.181529888 |
| H -0.998421474 1.159889094 0.932914704 |

**Acetyl radical:**

| x y z |
| --- |
| C -1.212290990 0.233742593 0.000000000 |
| C 0.136501126 -0.447438990 0.000000000 |
| O 1.192601288 0.022304020 0.000000000 |
| H -2.015480104 -0.484872472 0.000000000 |
| H -1.275433085 0.860425970 -0.881016495 |
| H -1.275433085 0.860425970 0.881016495 |

Acetyl radical, hydrated:

| x y z |
| --- |
| C 0.142615121 1.479115471 0.000000000 |
| C -0.042542728 0.014649799 0.000000000 |
| O 0.971907077 -0.895847563 0.000000000 |
| O -1.273747275 -0.545691345 0.000000000 |
| H -0.829224842 1.951168861 0.000000000 |
| H 0.682952073 1.832352760 -0.877642708 |
| H 0.682952073 1.832352760 0.877642708 |
| H 1.806343823 -0.463970880 0.000000000 |
| H -1.184063559 -1.483021493 0.000000000 |

Water:

| x y z |
| --- |
| O 0.000000000 0.000000000 -0.063355968 |
| H 0.000000000 0.751592999 0.502836216 |
| H 0.000000000 -0.751592999 0.502836216 |
